# Supplementary material for: Biogenic Synthesis of Magnetite Nanoparticles Using Leaf Extract of Thymus schimperi and Their Application for Monocomponent Removal of Chromium and Mercury Ions from Aqueous Solution
Source: Hindawi journal article supplement (doi:10.1155/2022/5798824), 2022-01-01
Supplement: f1 [file 5798824.f1.docx]

**Supplementary information for manuscript entitled ‘Biogenic Synthesis of Magnetite Nanoparticles Using Leaf Extract of *Thymus schimperi* and Their Application for Removal of Chromium and Mercury Ions from Aqueous Solution’ (with Manuscript ID5798824)**


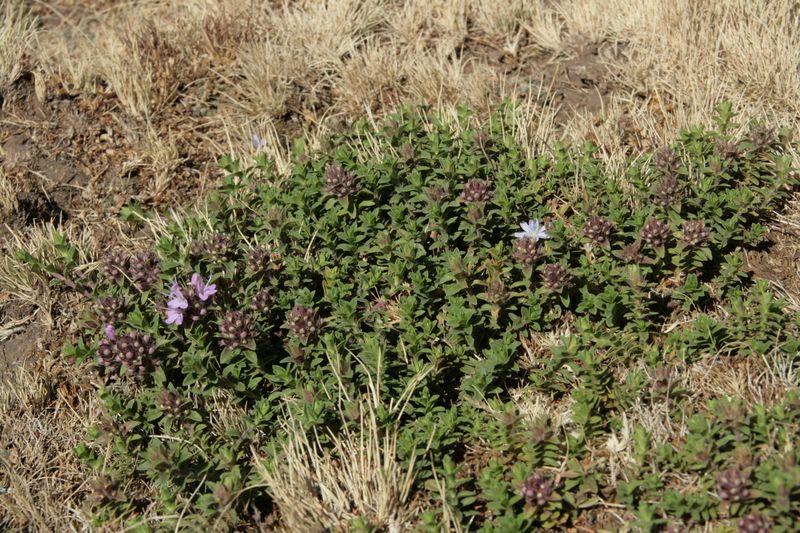


**Figure 1s:**  Leaves of *Thymus schimperi* used for biogenic synthesis of Fe3O4 NPs.

**Figure 2s:** Pseudo first (a & b) and second (c & d) order kinetics model for adsorption of Cr(VI) and Hg(II) on surface of Fe3O4 NPs from aqueous solution.

**Figure 3s:** Freundlich (a &c) and Langmuir (b &d) isotherms for adsorption of Cr(VI) and Hg(II) cations from aqueous solution.

**Figure 4s**: UV-Visible absorbance spectra of Cr(VI) metal ions solutions in 1st (c1), 2nd (c2), 3rd  (c3), 4th (c4) and 5th (c5) cycles of adsorption against standard initial concentration of Cr(VI) ions during regeneration study of Fe3O4 nanostructures (with DPC as colouring agent).

**Figure 5s**: UV-Visible absorbance spectra of Hg (II) metal ions solutions in 1st (c1), 2nd (c2), 3rd  (c3), 4th (c4) and 5th (c5) cycles of adsorption against standard initial concentration of Hg(II) ions during regeneration study of Fe3O4 nanostructures (with potassium permanganate as colouring agent).
